# Supplementary material
Source: Springer Nature journal article supplement (https://www.springermedizin.de/resource/supplementary/12883_2010_387_MOESM6_ESM.pdf/9455038)

**A****estim ICP vs. Altitude**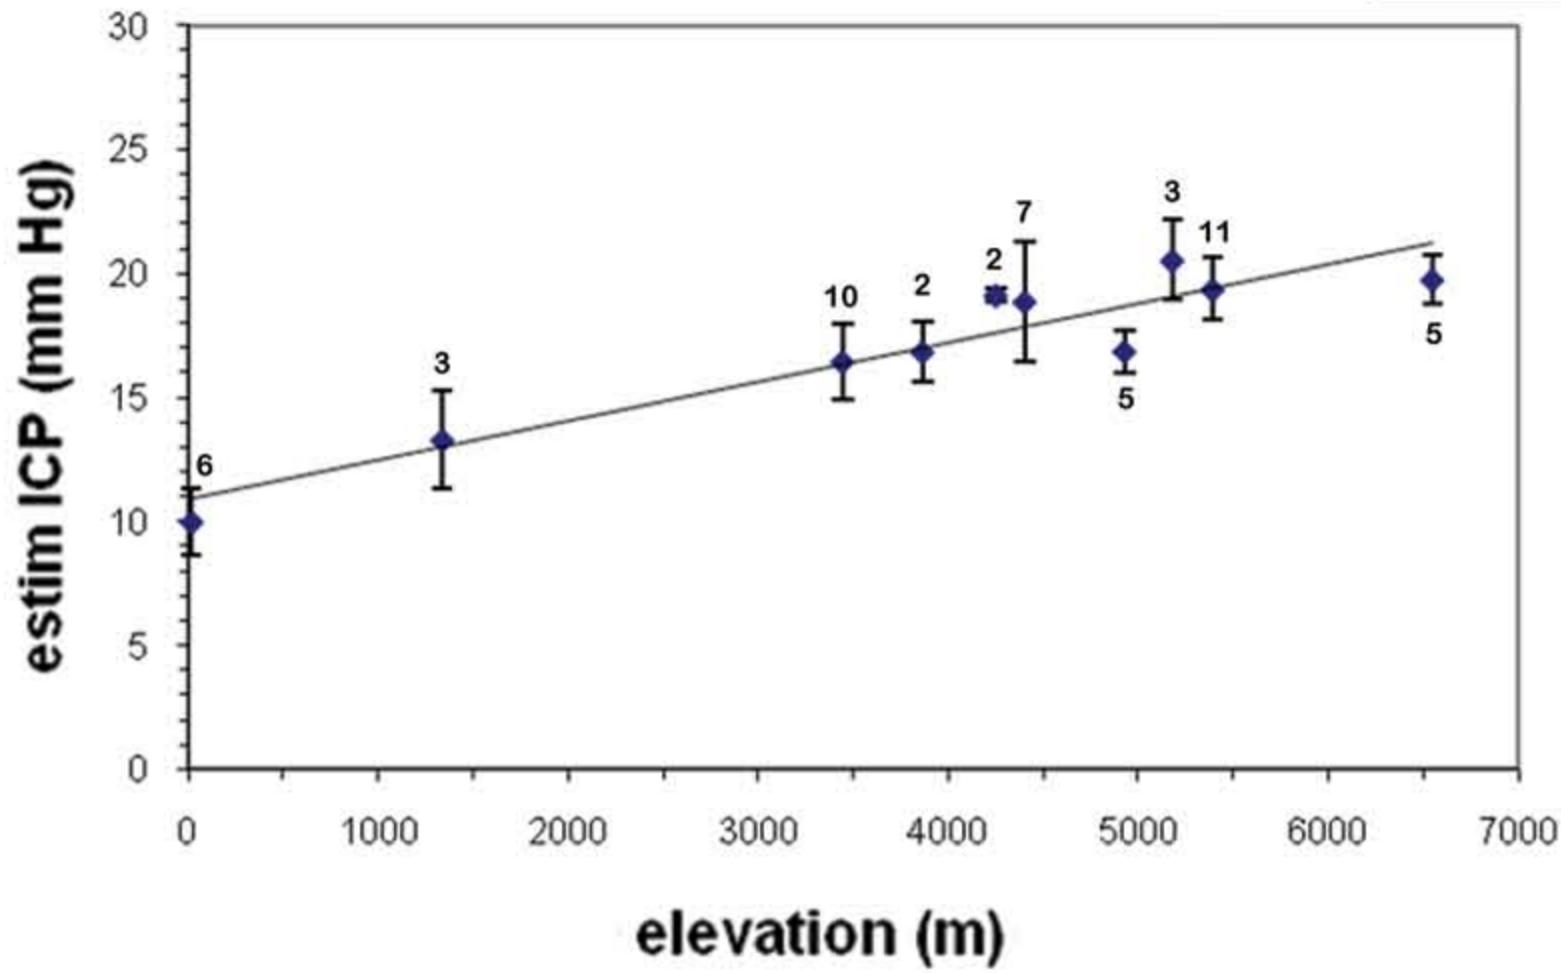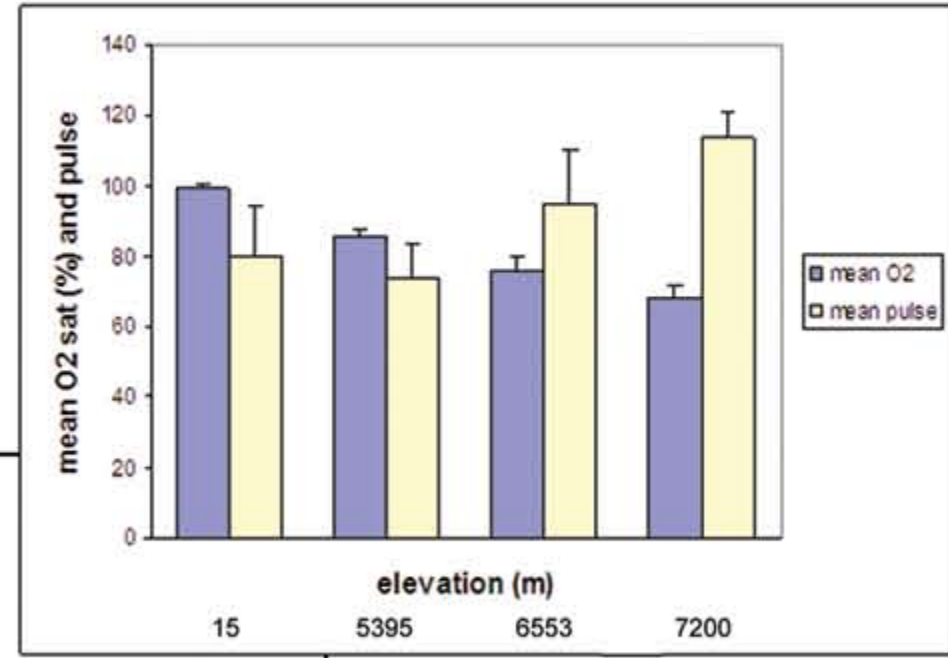**B****Individual estim ICP profiles**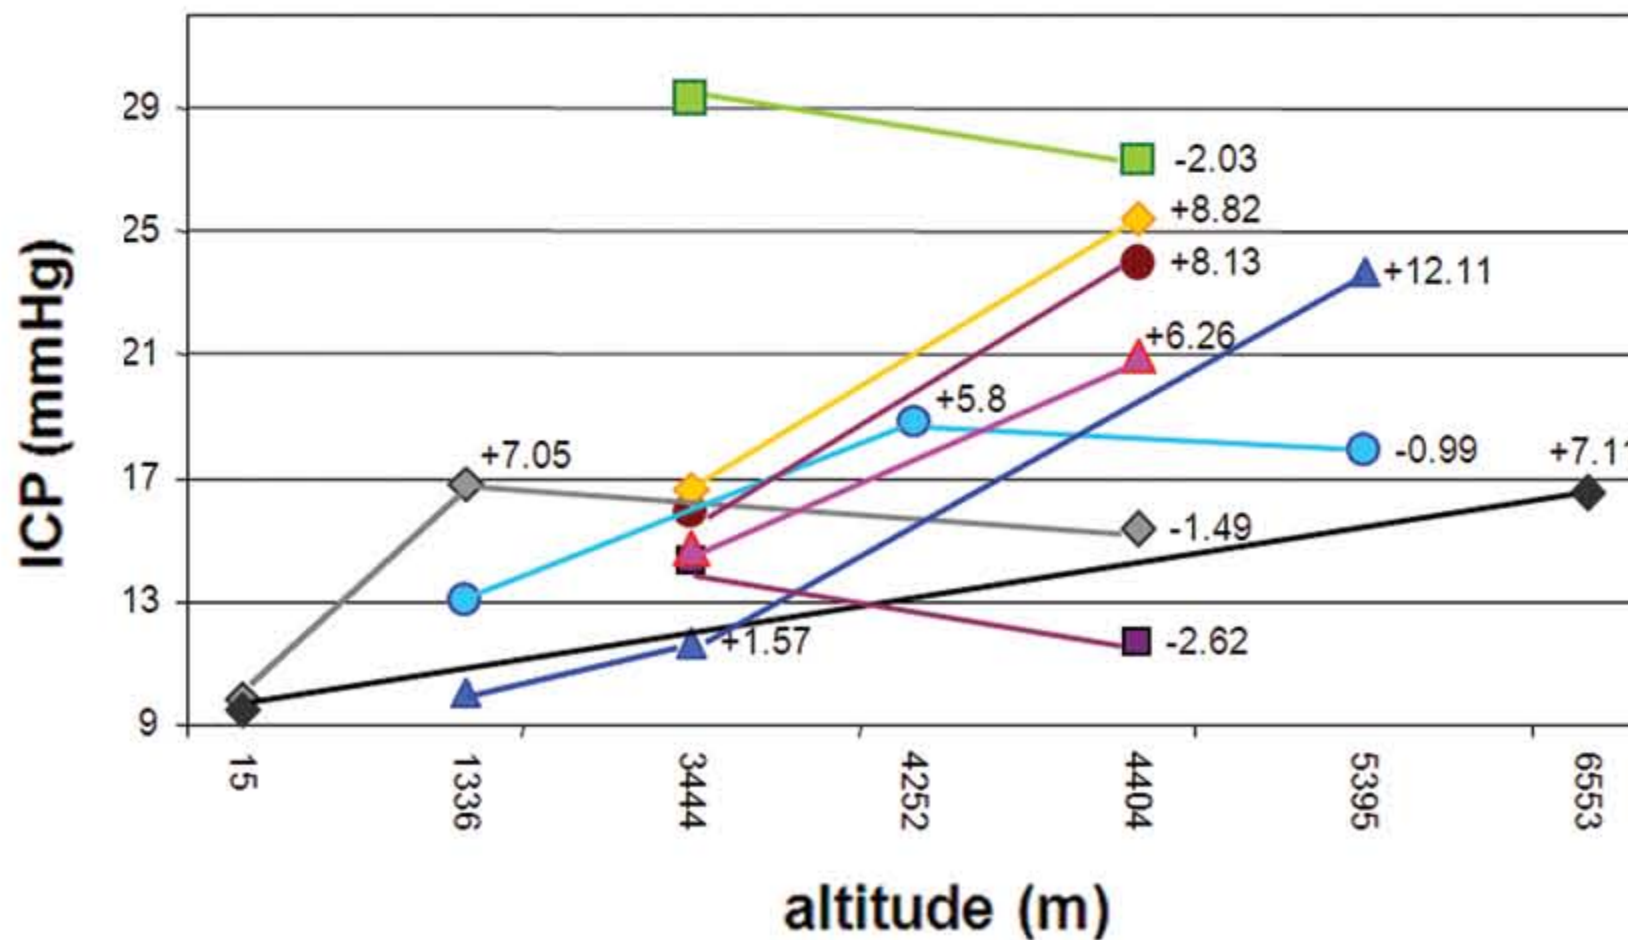

Supplement: MOESM6 [file 9455038]
